# Supplementary material for: Multiconfigurational actinide nitrides assisted by double Möbius aromaticity
Source: Royal Society of Chemistry journal article supplement (doi:10.1039/d4sc01549e), 2024-01-01
Supplement: d4sc01549e1.pdf [file d4sc01549e1.pdf]

*Supplementary Information for*

**Multiconfigurational Actinide Nitrides Assisted by Double Möbius Aromaticity**

Xuhui Lin<sup>\*1</sup>, Xiaoli Lu<sup>2</sup>, Shenghui Tang<sup>2</sup>, Wei Wu<sup>3\*</sup>, Yirong Mo<sup>\*4</sup>

<sup>1</sup> School of Physics, Central South University, Changsha, Hunan 410083, China;

<sup>2</sup> School of Chemistry, Southwest Jiaotong University, Chengdu, Sichuan 610031, China;

<sup>3</sup> The State Key Laboratory of Physical Chemistry of Solid Surfaces, iChEM, Fujian Provincial Key Laboratory of Theoretical and Computational Chemistry and College of Chemistry and Chemical Engineering, Xiamen University, Xiamen, Fujian 361005, China;

<sup>4</sup> Department of Nanoscience, Joint School of Nanoscience and Nanoengineering, University of North Carolina at Greensboro, Greensboro, NC 27401, United States.

**E-mails:**

xuhui.lin@csu.edu.cn (XL); weiwu@xmu.edu.cn (WW); y\_mo3@uncg.edu (YM)

## Table of Contents

|                                                                                                                                                                                                                       |    |
|-----------------------------------------------------------------------------------------------------------------------------------------------------------------------------------------------------------------------|----|
| <b>Table S1.</b> Energy gaps between different spin states with ANO-RCC basis set with DKH correction and ECP60MDF basis set for $U_2N_2$ .....                                                                       | 3  |
| <b>Table S2.</b> Computed delocalization energies for each spin multiplicity at VBSCF and VBPT2 level .....                                                                                                           | 4  |
| <b>Table S3.</b> Major optimal parameters for $U_2N_2$ by various methods.....                                                                                                                                        | 5  |
| <b>Table S4-S7.</b> Computed absolute energies and relative energies of all electronic states for singlet, triplet, quintet and septet $U_2N_2$ using a (6,10) active space with ANO-RCC-DKH basis set.....           | 6  |
| <b>Figure S1-S7.</b> Eight Valence canonical molecular orbitals (CMOs) with the isovalue of 0.045 a.u. for $Pa_2N_2$ , $Th_2N_2$ , $Ac_2N_2$ , $[U_2N_2]^+$ and compounds <b>I-III</b> .....                          | 10 |
| <b>Figure S8.</b> The canonical molecular orbitals (CMOs) with the isovalue of 0.05 a.u. for linear $U_2N_2$ and $[H_2N-An-N-An-NH]$ relative to the delocalized $\sigma$ and $\pi$ orbitals in cyclic $U_2N_2$ ..... | 13 |
| <b>Figure S9.</b> The strength and direction of the induced current for $Pa_2N_2$ , $Th_2N_2$ and $Ac_2N_2$ by GIMIC program.....                                                                                     | 14 |
| <b>Figure S10.</b> Isosurfaces of ACID (isovalue = 0.03) for $U_2N_2$ , $Pa_2N_2$ , $Th_2N_2$ and $Ac_2N_2$ .....                                                                                                     | 15 |
| <b>Optimal Coordinates xyz</b> for all studied systems.....                                                                                                                                                           | 16 |

**Table S1.** Energy gaps between different spin states with ANO-RCC basis set with DKH correction and ECP60MDF basis set for U<sub>2</sub>N<sub>2</sub>.

| Method          | Basis set | <sup>1</sup> A <sub>g</sub> | <sup>3</sup> B <sub>1u</sub> | <sup>5</sup> A <sub>g</sub> | <sup>7</sup> B <sub>1u</sub> |
|-----------------|-----------|-----------------------------|------------------------------|-----------------------------|------------------------------|
| PBE0            | ECP60MDF  | 114.7                       | 12.7                         | 23.0                        | 0.0                          |
|                 | ANO-RCC   | 63.4                        | 25.8                         | 20.7                        | 0.0                          |
| CASSCF (6,26)   | ECP60MDF  | 0.0                         | 0.2                          | 0.8                         | 1.7                          |
|                 | ANO-RCC   | 0.0                         | 0.3                          | 0.8                         | 1.8                          |
| CASPT2 (6,26)   | ECP60MDF  | 0.0                         | 0.7                          | 2.0                         | 4.2                          |
|                 | ANO-RCC   | 0.0                         | 0.7                          | 2.1                         | 4.5                          |
| CASSCF (6,10)   | ECP60MDF  | 0.0                         | 0.2                          | 0.6                         | 1.3                          |
|                 | ANO-RCC   | 0.0                         | 0.2                          | 0.7                         | 1.3                          |
| CASPT2(6,10)    | ECP60MDF  | 0.0                         | 1.0                          | 2.8                         | 5.5                          |
|                 | ANO-RCC   | 0.0                         | 1.0                          | 2.9                         | 6.0                          |
| MS-CASPT2(6,10) | ECP60MDF  | 0.0                         | 0.4                          | 0.7                         | 2.2                          |
|                 | ANO-RCC   | 0.0                         | 0.4                          | 0.8                         | 2.4                          |
| CASSCF (6,6)    | ECP60MDF  | 0.0                         | 0.2                          | 0.7                         | 1.4                          |
|                 | ANO-RCC   | 0.0                         | 0.2                          | 0.7                         | 1.5                          |
| CASPT2 (6,6)    | ECP60MDF  | 0.0                         | 1.2                          | 3.1                         | 6.4                          |
|                 | ANO-RCC   | 0.0                         | 1.1                          | 3.2                         | 6.5                          |
| VBSCF (6,6)     | ECP60MDF  | 0.0                         | 0.3                          | 0.8                         | 1.7                          |
| VBPT2 (6,6)     | ANO-RCC   | 0.0                         | 0.7                          | 2.4                         | 5.5                          |

**Table S2. Computed delocalization energies for each spin multiplicity at VBSCF and VBPT2 level.**

| Species                                       | Spin | VBSCF            |                  |                     |                    | VBPT2            |                  |                     |                    |
|-----------------------------------------------|------|------------------|------------------|---------------------|--------------------|------------------|------------------|---------------------|--------------------|
|                                               |      | $\Delta E_{U-N}$ | $\Delta E_{\pi}$ | $\Delta E_{\sigma}$ | $\Delta E_{total}$ | $\Delta E_{U-N}$ | $\Delta E_{\pi}$ | $\Delta E_{\sigma}$ | $\Delta E_{total}$ |
| U <sub>2</sub> N <sub>2</sub>                 | 1    | 2.0              | 41.9             | 32.9                | 77.0               | 0.8              | 24.3             | 20.4                | 42.4               |
|                                               | 3    | 2.0              | 42.0             | 32.9                | 77.1               | 0.8              | 24.4             | 20.5                | 42.5               |
|                                               | 5    | 2.0              | 41.9             | 33.1                | 77.1               | 0.8              | 24.2             | 20.8                | 42.5               |
|                                               | 7    | 2.0              | 41.9             | 33.2                | 77.1               | 0.8              | 23.9             | 21.1                | 42.3               |
| Pa <sub>2</sub> N <sub>2</sub>                | 1    | 1.9              | 42.6             | 33.3                | 77.9               | 0.7              | 24.3             | 20.5                | 42.7               |
|                                               | 3    | 1.9              | 42.6             | 33.3                | 77.9               | 0.7              | 24.3             | 20.5                | 42.7               |
|                                               | 5    | 1.9              | 42.5             | 33.3                | 77.9               | 0.6              | 23.9             | 20.5                | 42.3               |
| Th <sub>2</sub> N <sub>2</sub>                | 1    | 1.9              | 40.5             | 30.2                | 72.7               | 0.9              | 21.6             | 16.8                | 36.2               |
|                                               | 3    | 1.9              | 40.4             | 30.2                | 72.7               | 0.8              | 21.5             | 16.8                | 36.1               |
| Ac <sub>2</sub> N <sub>2</sub>                | 1    | 2.0              | 30.2             | 21.6                | 53.1               | 1.5              | 11.5             | 15.2                | 25.6               |
|                                               | 2    | 2.2              | 45.6             | 35.2                | 83.6               | 0.8              | 26.5             | 23.7                | 47.9               |
| [U <sub>2</sub> N <sub>2</sub> ] <sup>+</sup> | 4    | 2.2              | 45.7             | 35.3                | 83.6               | 0.8              | 26.5             | 24.2                | 47.8               |
|                                               | 6    | 2.2              | 45.8             | 35.4                | 83.7               | 0.8              | 26.7             | 24.7                | 48.1               |
| Mol I                                         | 2    | 2.9              | 49.8             | 38.3                | 90.9               | 1.9              | 32.5             | 32.8                | 60.1               |
|                                               | 4    | 3.0              | 49.8             | 38.4                | 90.9               | 1.9              | 32.4             | 32.8                | 60.0               |
| Mol II                                        | 1    | 3.7              | 45.7             | 34.4                | 82.7               | 3.0              | 28.3             | 28.2                | 50.7               |
|                                               | 3    | 3.7              | 45.7             | 34.4                | 82.7               | 3.0              | 28.1             | 28.0                | 50.4               |
| Mol III                                       | 1    | 1.8              | 32.4             | 45.2                | 80.1               | 0.8              | 23.8             | 28.1                | 47.4               |
|                                               | 3    | 1.8              | 32.4             | 45.2                | 80.1               | 0.9              | 23.8             | 28.1                | 47.2               |
|                                               | 5    | 1.8              | 32.4             | 45.2                | 80.1               | 0.8              | 23.8             | 27.8                | 47.0               |

**Table S3. Major optimal parameter for U2N2 by PBE0/ECP60MDF and CASSCF(CASPT2)/ANO-RCC-DKH.**

| Method       | Spin | U-U   | U-N   | N-N   | $\theta_{N-U-N}$ |
|--------------|------|-------|-------|-------|------------------|
| PBE0         | 1    | 3.097 | 1.979 | 2.466 | 77.1             |
|              | 3    | 3.120 | 2.006 | 2.521 | 77.9             |
|              | 5    | 3.091 | 2.000 | 2.540 | 78.8             |
|              | 7    | 3.126 | 2.013 | 2.536 | 78.1             |
| CASSCF(6,10) | 1    | 3.137 | 2.037 | 2.599 | 79.3             |
|              | 3    | 3.138 | 2.037 | 2.598 | 79.2             |
|              | 5    | 3.140 | 2.037 | 2.597 | 79.2             |
|              | 7    | 3.144 | 2.038 | 2.595 | 79.1             |
| CASSCF(6.6)  | 1    | 3.131 | 2.035 | 2.601 | 79.4             |
|              | 3    | 3.133 | 2.036 | 2.600 | 79.4             |
|              | 5    | 3.135 | 2.036 | 2.599 | 79.3             |
|              | 7    | 3.139 | 2.037 | 2.597 | 79.2             |
| CASPT2(6,10) | 1    | 3.133 | 2.035 | 2.599 | 79.4             |
|              | 3    | 3.136 | 2.036 | 2.597 | 79.3             |
|              | 5    | 3.139 | 2.036 | 2.596 | 79.2             |
|              | 7    | 3.142 | 2.037 | 2.594 | 79.1             |
| CASPT2(6.6)  | 1    | 3.128 | 2.034 | 2.601 | 79.5             |
|              | 3    | 3.129 | 2.034 | 2.601 | 79.5             |
|              | 5    | 3.134 | 2.035 | 2.598 | 79.3             |
|              | 7    | 3.138 | 2.036 | 2.596 | 79.2             |

**Table S4.** Computed absolute energies (AE, a.u.) and relative energies (RE, kcal/mol) of all electronic states for singlet U<sub>2</sub>N<sub>2</sub> using a (6,10) active space with ANO-RCC-DKH basis set.

| State                        | CASSCF      |      | CASPT2      |      |
|------------------------------|-------------|------|-------------|------|
|                              | AE          | RE   | AE          | RE   |
| <sup>1</sup> A <sub>g</sub>  | -56008.6780 | 0.0  | -56010.1106 | 0.0  |
| <sup>1</sup> B <sub>3u</sub> | -56008.6611 | 10.6 | -56010.1031 | 4.7  |
| <sup>1</sup> B <sub>2u</sub> | -56008.6629 | 9.5  | -56010.1051 | 3.5  |
| <sup>1</sup> B <sub>1g</sub> | -56008.6758 | 1.4  | -56010.1116 | -0.6 |
| <sup>1</sup> B <sub>1u</sub> | -56008.6533 | 15.5 | -56010.0986 | 7.6  |
| <sup>1</sup> B <sub>2g</sub> | -56008.6612 | 10.6 | -56010.1032 | 4.6  |
| <sup>1</sup> B <sub>3g</sub> | -56008.6629 | 9.5  | -56010.1049 | 3.6  |
| <sup>1</sup> A <sub>u</sub>  | -56008.6758 | 1.4  | -56010.1117 | -0.7 |

**Table S5.** Computed absolute energies (AE, a.u.) and relative energies (RE, kcal/mol) of all electronic states for triplet U<sub>2</sub>N<sub>2</sub> using a (6,10) active space with ANO-RCC-DKH basis set.

| State      | CASSCF      |      | CASPT2      |      |
|------------|-------------|------|-------------|------|
|            | AE          | RE   | AE          | RE   |
| $^3A_g$    | -56008.6628 | 9.3  | -56010.0870 | 13.8 |
| $^3B_{3u}$ | -56008.6608 | 10.6 | -56010.1018 | 4.5  |
| $^3B_{2u}$ | -56008.6625 | 9.5  | -56010.1028 | 3.9  |
| $^3B_{1g}$ | -56008.6754 | 1.4  | -56010.1101 | -0.7 |
| $^3B_{1u}$ | -56008.6777 | 0.0  | -56010.1090 | 0.0  |
| $^3B_{2g}$ | -56008.6607 | 10.6 | -56010.1017 | 4.5  |
| $^3B_{3g}$ | -56008.6625 | 9.5  | -56010.1029 | 3.8  |
| $^3A_u$    | -56008.6754 | 1.4  | -56010.1100 | -0.7 |

**Table S6.** Computed absolute energies (AE, a.u.) and relative energies (RE, kcal/mol) of all electronic states for quintet U<sub>2</sub>N<sub>2</sub> using a (6,10) active space with ANO-RCC-DKH basis set.

| State      | CASSCF      |      | CASPT2      |      |
|------------|-------------|------|-------------|------|
|            | AE          | RE   | AE          | RE   |
| $^5A_g$    | -56008.6769 | 0.0  | -56010.1059 | 0.0  |
| $^5B_{3u}$ | -56008.6600 | 10.6 | -56010.0986 | 4.6  |
| $^5B_{2u}$ | -56008.6501 | 16.9 | -56010.0863 | 12.3 |
| $^5B_{1g}$ | -56008.6628 | 8.8  | -56010.0935 | 7.8  |
| $^5B_{1u}$ | -56008.6629 | 8.8  | -56010.0873 | 11.7 |
| $^5B_{2g}$ | -56008.6487 | 17.7 | -56010.0852 | 12.9 |
| $^5B_{3g}$ | -56008.6501 | 16.8 | -56010.0863 | 12.3 |
| $^5A_u$    | -56008.6747 | 1.4  | -56010.1068 | -0.6 |



**Table S7.** Computed absolute energies (AE, a.u.) and relative energies (RE, kcal/mol) of all electronic states for septet U<sub>2</sub>N<sub>2</sub> using a (6,10) active space with ANO-RCC-DKH basis set.

| State        | CASSCF      |      | CASPT2      |      |
|--------------|-------------|------|-------------|------|
|              | AE          | RE   | AE          | RE   |
| ${}^7A_g$    | -56008.6514 | 15.3 | -56010.0900 | 6.9  |
| ${}^7B_{3u}$ | -56008.6588 | 10.8 | -56010.0944 | 4.1  |
| ${}^7B_{2u}$ | -56008.6605 | 9.6  | -56010.0950 | 3.8  |
| ${}^7B_{1g}$ | -56008.6738 | 1.3  | -56010.1025 | -1.0 |
| ${}^7B_{1u}$ | -56008.6759 | 0.0  | -56010.1010 | 0.0  |
| ${}^7B_{2g}$ | -56008.6588 | 10.7 | -56010.0944 | 4.1  |
| ${}^7B_{3g}$ | -56008.6604 | 9.7  | -56010.0936 | 4.6  |
| ${}^7A_u$    | -56008.6737 | 1.4  | -56010.1026 | -1.0 |

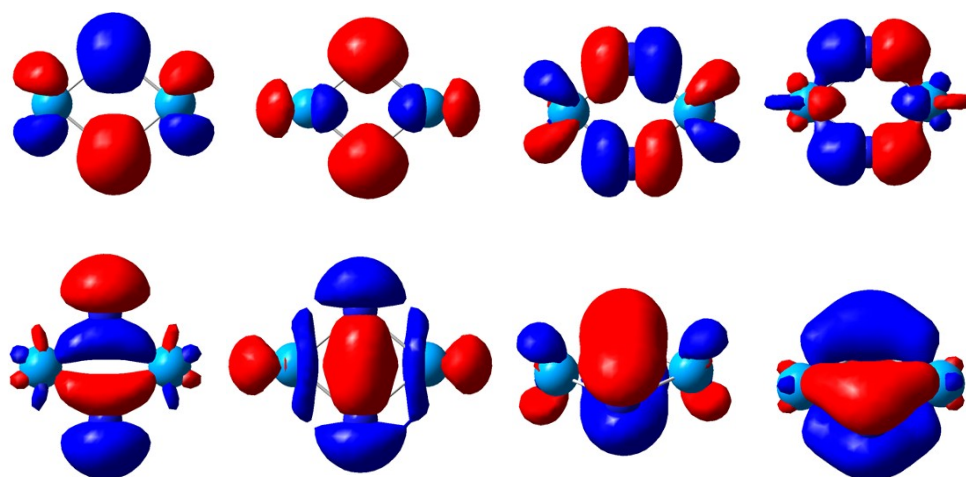

**Figure S1.** Eight Valence canonical molecular orbitals (CMOs) with the isovalue of 0.05 a.u. for  $\text{Pa}_2\text{N}_2$ .

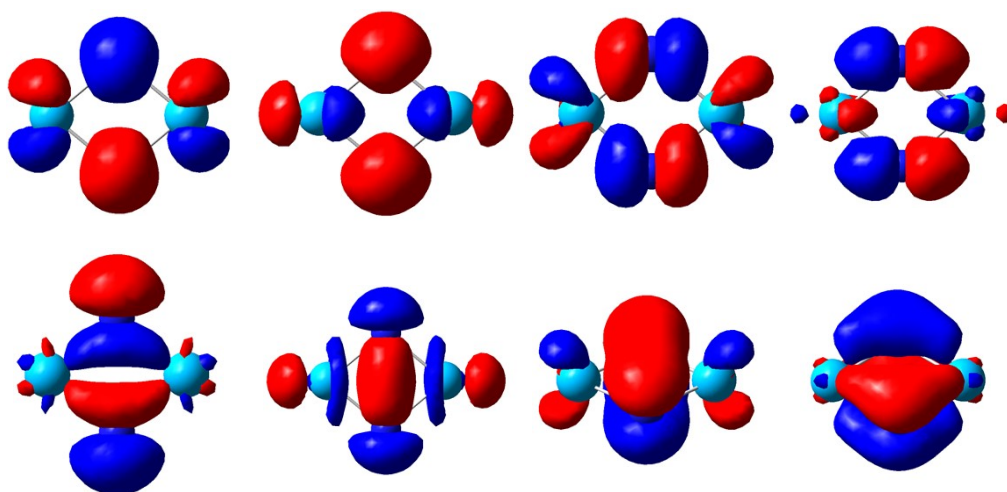

**Figure S2.** Eight Valence canonical molecular orbitals (CMOs) with the isovalue of 0.05 a.u. for  $\text{Th}_2\text{N}_2$ .

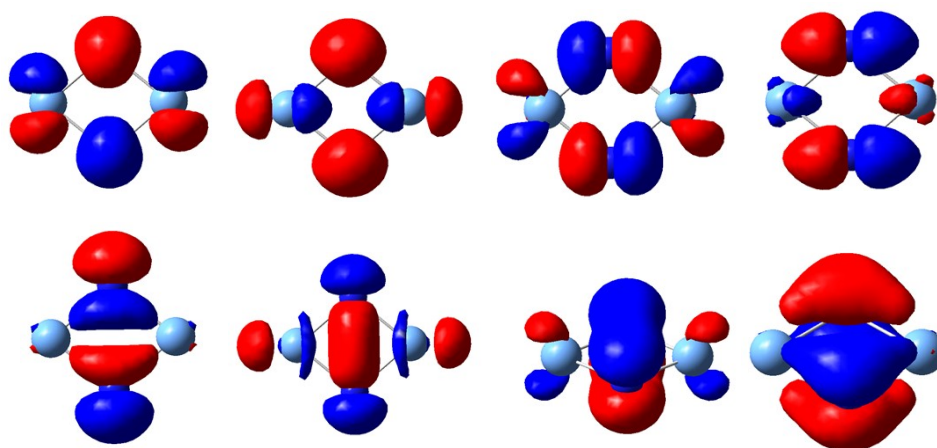

**Figure S3.** Eight Valence canonical molecular orbitals (CMOs) with the isovalue of 0.05 a.u. for  $\text{Ac}_2\text{N}_2$ .

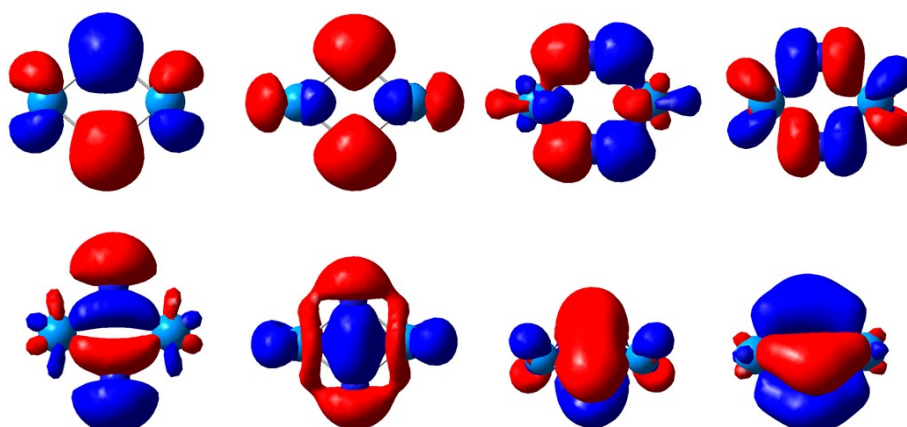

**Figure S4.** Eight Valence canonical molecular orbitals (CMOs) with the isovalue of 0.05 a.u. for  $[\text{U}_2\text{N}_2]^+$ .

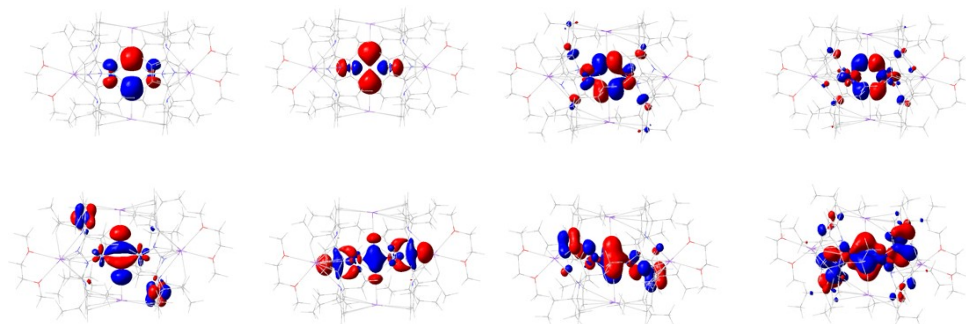

**Figure S5.** Eight Valence canonical molecular orbitals (CMOs) with the isovalue of 0.04 a.u. for compounds **I**.

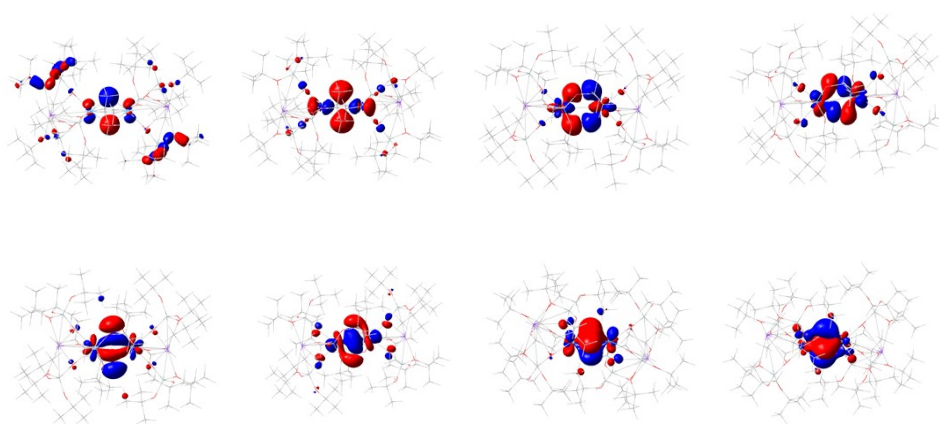

**Figure S6.** Eight Valence canonical molecular orbitals (CMOs) with the isovalue of 0.04 a.u. for compounds **II**.

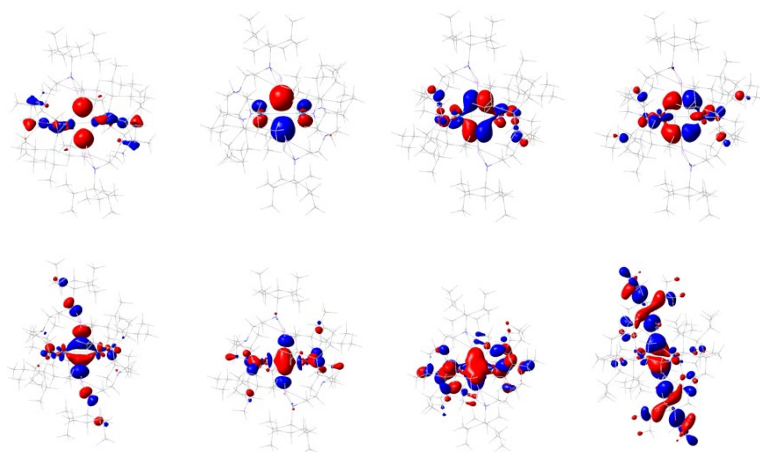

**Figure S7.** Eight Valence canonical molecular orbitals (CMOs) with the isovalue of 0.04 a.u. for compounds **III**.

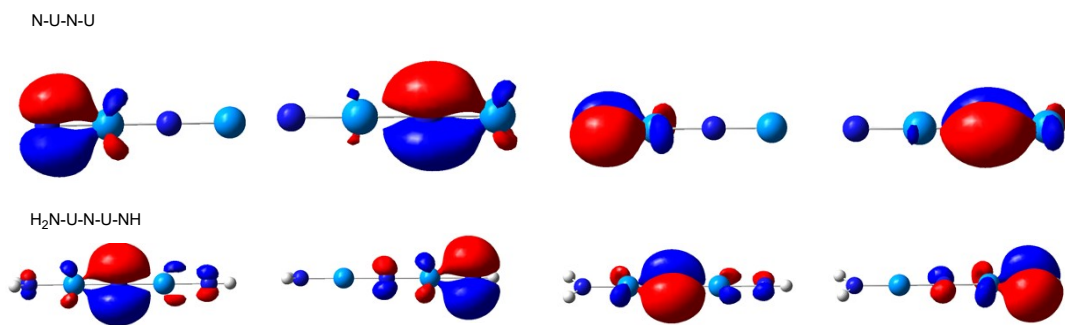

**Figure S8.** The canonical molecular orbitals (CMOs) with the isovalue of 0.05 a.u. for linear  $U_2N_2$  and  $[H_2N-An-N-An-NH]$  relative to the delocalized  $\sigma$  and  $\pi$  orbitals in cyclic  $U_2N_2$ .



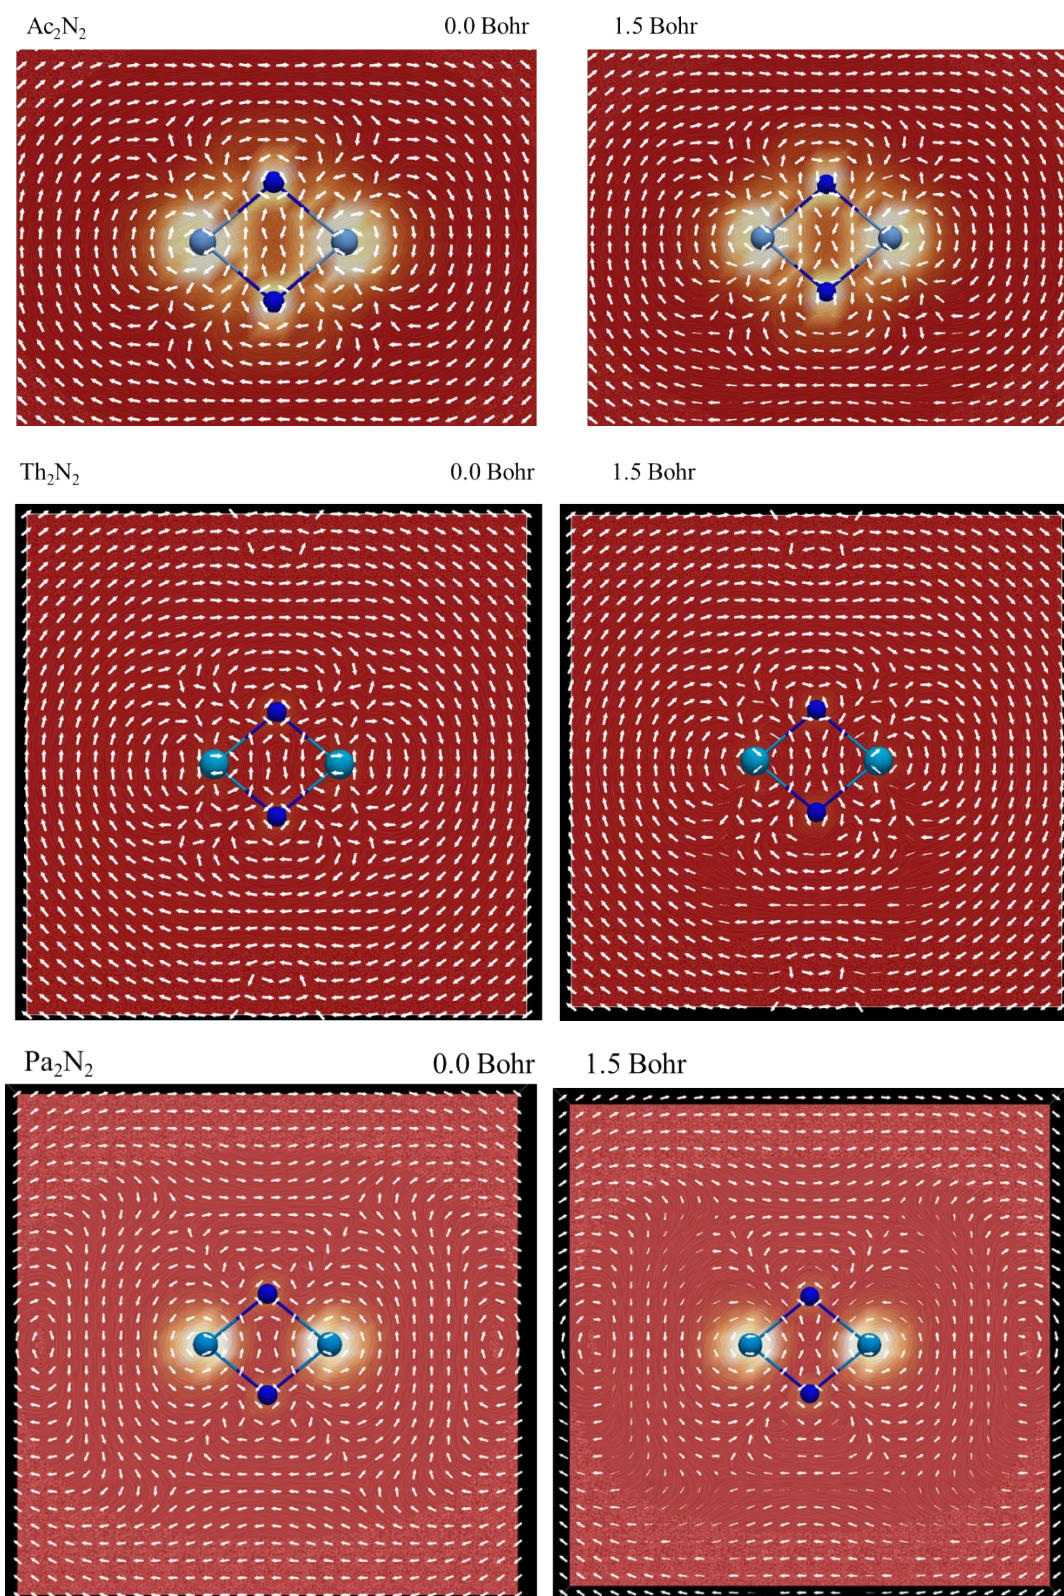

**Figure S9.** The strength and direction of the induced current for  $\text{Pa}_2\text{N}_2$ ,  $\text{Th}_2\text{N}_2$  and  $\text{Ac}_2\text{N}_2$  by GIMIC program.



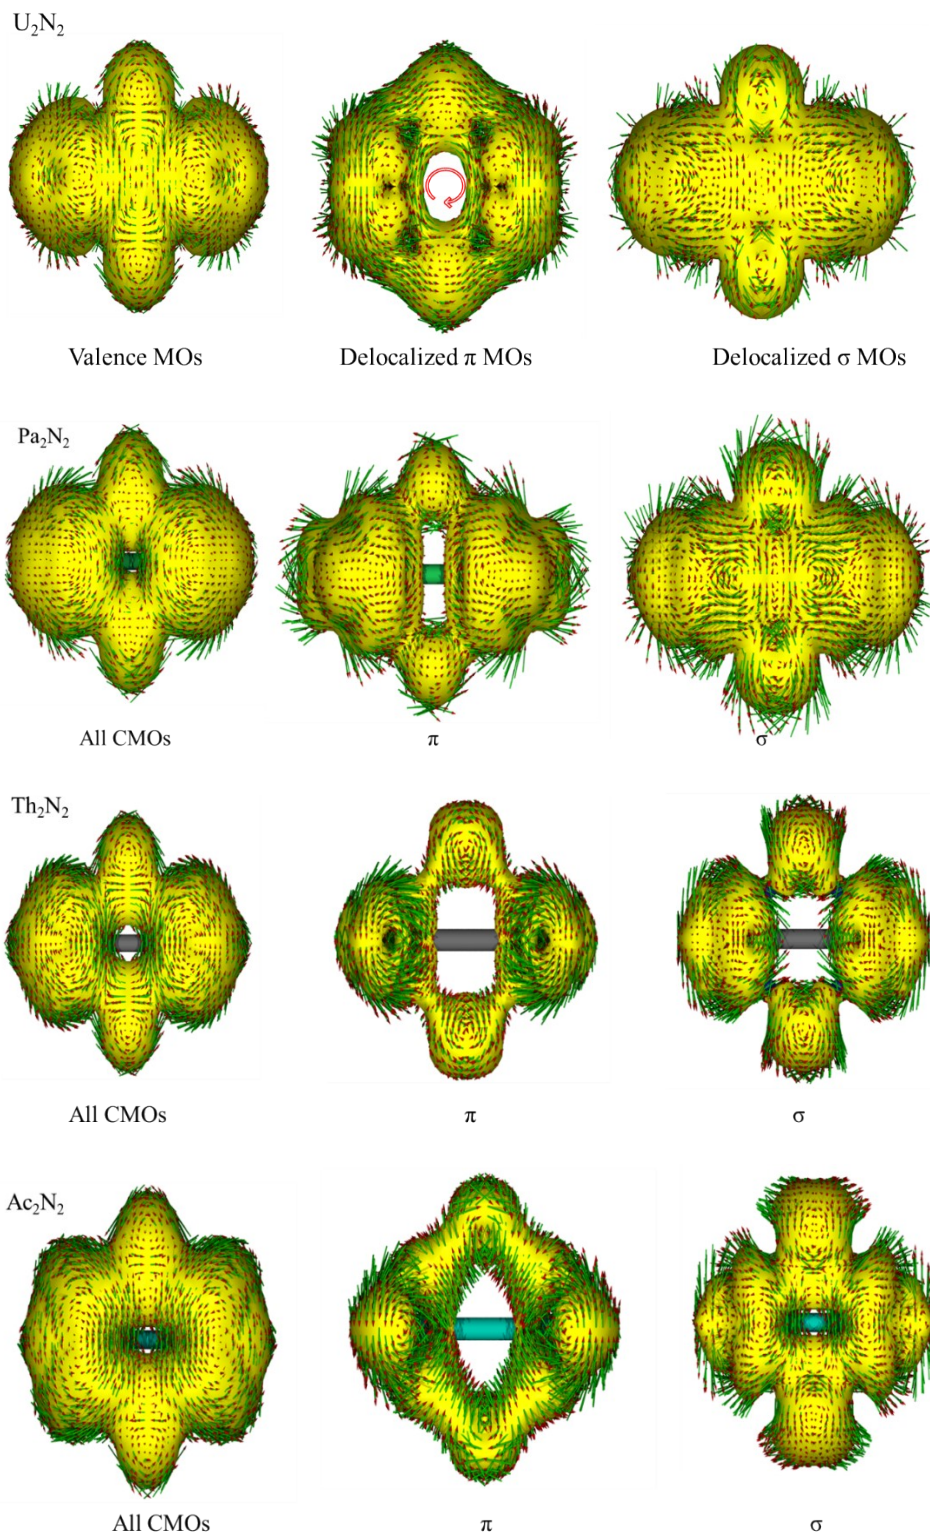

Figure S10. Isosurfaces of AICD (isovalue = 0.03) for Pa<sub>2</sub>N<sub>2</sub>, Th<sub>2</sub>N<sub>2</sub> and Ac<sub>2</sub>N<sub>2</sub> generated from all eight CMOs, the two delocalized  $\pi$  MOs, and two delocalized  $\sigma$  MOs.

### Optimal geometries for U<sub>2</sub>N<sub>2</sub> with CASSCF (6,10)/ANO-RCC

#### Singlet

|   |            |             |             |
|---|------------|-------------|-------------|
| U | 0.00000000 | 0.00000000  | 1.56657001  |
| U | 0.00000000 | 0.00000000  | -1.56657001 |
| N | 0.00000000 | 1.29957816  | 0.00000000  |
| N | 0.00000000 | -1.29957816 | 0.00000000  |

#### Triplet

|   |            |             |             |
|---|------------|-------------|-------------|
| U | 0.00000000 | 0.00000000  | 1.56800149  |
| U | 0.00000000 | 0.00000000  | -1.56800149 |
| N | 0.00000000 | 1.29852079  | 0.00000000  |
| N | 0.00000000 | -1.29852079 | 0.00000000  |

#### Quintet

|   |            |             |             |
|---|------------|-------------|-------------|
| U | 0.00000000 | 0.00000000  | 1.56931707  |
| U | 0.00000000 | 0.00000000  | -1.56931707 |
| N | 0.00000000 | 1.29782925  | 0.00000000  |
| N | 0.00000000 | -1.29782925 | 0.00000000  |

#### Septet

|   |            |             |             |
|---|------------|-------------|-------------|
| U | 0.00000000 | 0.00000000  | 1.57115034  |
| U | 0.00000000 | 0.00000000  | -1.57115034 |
| N | 0.00000000 | 1.29722775  | 0.00000000  |
| N | 0.00000000 | -1.29722775 | 0.00000000  |

### Optimal geometries for U<sub>2</sub>N<sub>2</sub> with CASSCF (6,6)/ANO-RCC

#### Singlet

|   |            |             |             |
|---|------------|-------------|-------------|
| U | 0.00000000 | 0.00000000  | 1.56409112  |
| U | 0.00000000 | 0.00000000  | -1.56409112 |
| N | 0.00000000 | 1.30044046  | 0.00000000  |
| N | 0.00000000 | -1.30044046 | 0.00000000  |

#### Triplet

|   |            |             |             |
|---|------------|-------------|-------------|
| U | 0.00000000 | 0.00000000  | 1.56441231  |
| U | 0.00000000 | 0.00000000  | -1.56441231 |
| N | 0.00000000 | 1.30043270  | 0.00000000  |
| N | 0.00000000 | -1.30043270 | 0.00000000  |

#### Quintet

|   |            |            |            |
|---|------------|------------|------------|
| U | 0.00000000 | 0.00000000 | 1.56681723 |
|---|------------|------------|------------|



|   |            |             |             |
|---|------------|-------------|-------------|
| U | 0.00000000 | 0.00000000  | -1.56681723 |
| N | 0.00000000 | 1.29883034  | 0.00000000  |
| N | 0.00000000 | -1.29883034 | 0.00000000  |

**Septet**

|   |            |             |             |
|---|------------|-------------|-------------|
| U | 0.00000000 | 0.00000000  | 1.56889426  |
| U | 0.00000000 | 0.00000000  | -1.56889426 |
| N | 0.00000000 | 1.29816673  | 0.00000000  |
| N | 0.00000000 | -1.29816673 | 0.00000000  |

**Optimal geometries for U<sub>2</sub>N<sub>2</sub> with PBE0/ECP60MDF**

**Singlet**

|   |            |             |             |
|---|------------|-------------|-------------|
| U | 0.00000000 | 0.00000000  | 1.54830500  |
| U | 0.00000000 | 0.00000000  | -1.54830500 |
| N | 0.00000000 | 1.23281400  | 0.00000000  |
| N | 0.00000000 | -1.23281400 | 0.00000000  |

**Triplet**

|   |            |             |             |
|---|------------|-------------|-------------|
| U | 0.00000000 | 0.00000000  | 1.55995600  |
| U | 0.00000000 | 0.00000000  | -1.55995600 |
| N | 0.00000000 | 1.26057500  | 0.00000000  |
| N | 0.00000000 | -1.26057500 | 0.00000000  |

**Quintet**

|   |            |             |             |
|---|------------|-------------|-------------|
| U | 0.00000000 | 0.00000000  | 1.54562700  |
| U | 0.00000000 | 0.00000000  | -1.54562700 |
| N | 0.00000000 | 1.26980700  | 0.00000000  |
| N | 0.00000000 | -1.26980700 | 0.00000000  |

**Septet**

|   |            |             |             |
|---|------------|-------------|-------------|
| U | 0.00000000 | 0.00000000  | 1.56313900  |
| U | 0.00000000 | 0.00000000  | -1.56313900 |
| N | 0.00000000 | 1.26815300  | 0.00000000  |
| N | 0.00000000 | -1.26815300 | 0.00000000  |

**Optimal geometries for I with PBE0/ECP60MDF**

|   |             |             |             |
|---|-------------|-------------|-------------|
| C | 5.48850715  | 3.88554747  | 2.95706660  |
| C | 2.54594820  | 3.26923591  | 4.72656221  |
| C | 2.49707949  | 3.53158908  | 3.22890253  |
| C | 3.30331547  | 4.31682303  | 0.40483723  |
| C | 4.80123965  | 2.53648247  | 2.83099772  |
| C | 7.04139821  | 2.93040385  | -0.09240642 |
| C | 3.32615394  | 2.56826674  | 2.35158921  |
| C | 3.28659986  | 4.19194334  | -1.00818859 |
| C | 3.24669102  | 3.01685619  | 0.90867080  |
| C | -3.81354477 | 3.91644202  | 3.00244553  |
| C | -1.38929564 | 2.55601298  | 4.33626593  |
| C | -5.19072337 | 4.18949559  | 2.41415596  |
| C | -2.70583189 | 4.54109445  | 0.32192112  |
| C | -1.51547199 | 2.91594665  | 2.86545961  |
| C | 5.49409399  | 3.31723739  | -3.17681495 |
| C | 2.76264408  | 1.17034672  | 2.47849804  |
| C | 3.22293328  | 2.82443265  | -1.28393603 |
| C | -2.78243313 | 4.44112816  | -1.09265876 |
| C | -2.94780428 | 2.85564594  | 2.27590576  |
| C | 8.52211622  | 1.12269509  | -0.35180736 |
| C | 1.45138486  | 0.80782667  | 2.82179191  |
| C | 4.06433601  | 3.03208107  | -3.61756343 |
| C | -2.87783084 | 3.24712298  | 0.81704299  |
| C | 3.17434686  | 2.19743406  | -2.66261643 |
| C | -3.50907477 | 1.46589569  | 2.51916851  |
| C | -2.99410200 | 3.09250871  | -1.36876755 |
| C | -4.56448053 | 1.17496210  | 3.37858285  |
| C | 8.58505074  | -0.32302220 | -0.77627916 |
| C | 1.44896104  | -0.59969066 | 2.91581467  |
| C | 1.71785417  | 2.28571838  | -3.19217288 |
| C | 2.76077655  | -1.00926599 | 2.63595495  |
| C | -7.93049188 | 2.48294222  | 0.12434197  |
| C | -5.50205377 | 3.73172317  | -3.05980674 |
| C | 2.81373797  | -2.64080002 | 5.22439545  |
| C | -2.58540596 | 3.19160651  | -3.82599706 |
| C | 3.60434059  | 0.74084530  | -2.69681932 |
| C | 4.81987179  | -2.38095371 | 2.92788324  |
| C | -3.29057776 | 2.42451598  | -2.68824813 |
| C | -4.62446863 | -0.22891972 | 3.49193338  |
| C | 4.62446863  | 0.22891972  | -3.49193338 |
| C | 1.49597680  | 1.74391581  | -4.59544105 |
| C | -1.49597680 | -1.74391581 | 4.59544105  |
| C | 3.29057776  | -2.42451598 | 2.68824813  |

|   |             |             |             |
|---|-------------|-------------|-------------|
| C | -4.81987179 | 2.38095371  | -2.92788324 |
| C | 7.93049188  | -2.48294222 | -0.12434197 |
| C | 5.50205377  | -3.73172317 | 3.05980674  |
| C | 2.58540596  | -3.19160651 | 3.82599706  |
| C | -2.81373797 | 2.64080002  | -5.22439545 |
| C | -3.60434059 | -0.74084530 | 2.69681932  |
| C | -8.58505074 | 0.32302220  | 0.77627916  |
| C | -2.76077655 | 1.00926599  | -2.63595495 |
| C | 4.56448053  | -1.17496210 | -3.37858285 |
| C | -1.71785417 | -2.28571838 | 3.19217288  |
| C | 2.99410200  | -3.09250871 | 1.36876755  |
| C | -1.44896104 | 0.59969066  | -2.91581467 |
| C | 3.50907477  | -1.46589569 | -2.51916851 |
| C | -3.17434686 | -2.19743406 | 2.66261643  |
| C | -8.52211622 | -1.12269509 | 0.35180736  |
| C | -4.06433601 | -3.03208107 | 3.61756343  |
| C | 2.87783084  | -3.24712298 | -0.81704299 |
| C | -1.45138486 | -0.80782667 | -2.82179191 |
| C | 2.78243313  | -4.44112816 | 1.09265876  |
| C | 2.94780428  | -2.85564594 | -2.27590576 |
| C | -3.22293328 | -2.82443265 | 1.28393603  |
| C | -5.49409399 | -3.31723739 | 3.17681495  |
| C | -2.76264408 | -1.17034672 | -2.47849804 |
| C | 5.19072337  | -4.18949559 | -2.41415596 |
| C | 2.70583189  | -4.54109445 | -0.32192112 |
| C | 1.51547199  | -2.91594665 | -2.86545961 |
| C | 3.81354477  | -3.91644202 | -3.00244553 |
| C | 1.38929564  | -2.55601298 | -4.33626593 |
| C | -7.04139821 | -2.93040385 | 0.09240642  |
| C | -3.24669102 | -3.01685619 | -0.90867080 |
| C | -3.28659986 | -4.19194334 | 1.00818859  |
| C | -3.32615394 | -2.56826674 | -2.35158921 |
| C | -4.80123965 | -2.53648247 | -2.83099772 |
| C | -3.30331547 | -4.31682303 | -0.40483723 |
| C | -2.49707949 | -3.53158908 | -3.22890253 |
| C | -2.54594820 | -3.26923591 | -4.72656221 |
| C | -5.48850715 | -3.88554747 | -2.95706660 |
| H | 5.03043815  | 4.51389273  | 3.73701659  |
| H | 1.85305820  | 3.93733605  | 5.26187489  |
| H | 6.54898238  | 3.75766745  | 3.22888041  |
| H | 3.55155557  | 3.43724437  | 5.14245713  |
| H | 2.82758555  | 4.56306653  | 3.02883781  |
| H | 5.44524908  | 4.44808626  | 2.01244766  |
| H | 3.39124125  | 5.24009207  | 0.97835729  |

|   |             |             |             |
|---|-------------|-------------|-------------|
| H | 2.25972786  | 2.23253312  | 4.95839017  |
| H | 1.45174548  | 3.48859565  | 2.88344366  |
| H | 7.40761909  | 3.12476076  | 0.93163078  |
| H | 4.84035744  | 2.00417335  | 3.79538840  |
| H | -3.24101971 | 4.85969230  | 3.00562147  |
| H | 5.96805503  | 3.16230459  | -0.13902981 |
| H | 3.35986887  | 5.00148491  | -1.73568298 |
| H | -1.94511120 | 3.25280229  | 4.98210526  |
| H | -2.60971764 | 5.45706926  | 0.90757581  |
| H | 7.58076615  | 3.59156389  | -0.79602026 |
| H | -5.72534609 | 4.95065198  | 3.00618768  |
| H | -1.12434982 | 3.93649431  | 2.69536242  |
| H | -0.33781288 | 2.57918246  | 4.66036951  |
| H | 5.51957917  | 4.05549238  | -2.36463451 |
| H | 5.36351236  | 1.89632089  | 2.13602838  |
| H | -3.91357747 | 3.62897081  | 4.06006428  |
| H | 6.08514206  | 3.71660346  | -4.01785865 |
| H | -5.10906455 | 4.55313115  | 1.37915813  |
| H | 8.90023554  | 1.22007991  | 0.68645278  |
| H | -2.75293944 | 5.26096896  | -1.81121808 |
| H | 3.55206765  | 3.99383570  | -3.79578314 |
| H | -1.77855565 | 1.54441031  | 4.52240051  |
| H | 0.61503286  | 1.46291781  | 3.02389114  |
| H | 5.99636168  | 2.41123317  | -2.80986450 |
| H | -0.89657921 | 2.23958076  | 2.25413108  |
| H | -5.80681208 | 3.27947178  | 2.40165954  |
| H | 9.19367067  | 1.71254037  | -1.00913413 |
| H | -5.18792195 | 1.88423720  | 3.91791179  |
| H | 1.41182755  | 3.34859440  | -3.15457205 |
| H | -7.65174839 | 2.76823811  | 1.15522788  |
| H | 4.07846399  | 2.52478840  | -4.59284250 |
| H | -5.28967055 | 4.36648875  | -2.18511944 |
| H | 2.54278987  | -1.57523564 | 5.27812173  |
| H | -2.90162267 | 4.24630435  | -3.79065971 |
| H | 9.64373243  | -0.65186951 | -0.75090570 |
| H | 5.02280479  | -1.75757977 | 3.81374356  |
| H | -7.25108301 | 2.99334868  | -0.57218598 |
| H | 3.86558530  | -2.73410584 | 5.53768936  |
| H | -5.16993148 | 4.28129895  | -3.95507491 |
| H | -1.80098514 | -0.68896691 | 4.65557480  |
| H | -8.96480151 | 2.82671671  | -0.06937051 |
| H | -1.50597103 | 3.20513090  | -3.60576134 |
| H | 5.27324033  | -1.83122500 | 2.09257964  |
| H | 1.07813696  | 1.74739476  | -2.47393913 |

|   |             |             |             |
|---|-------------|-------------|-------------|
| H | 0.61359156  | -1.22403636 | 3.20037127  |
| H | 8.22684728  | -0.42246161 | -1.82118178 |
| H | 5.31133416  | 0.78827620  | -4.12223921 |
| H | 2.06787815  | 2.30364114  | -5.35049592 |
| H | -6.59436827 | 3.61004527  | -3.14271593 |
| H | 2.20140933  | -3.18155773 | 5.96324169  |
| H | -0.43504749 | -1.80481886 | 4.88265220  |
| H | -8.22684728 | 0.42246161  | 1.82118178  |
| H | 6.59436827  | -3.61004527 | 3.14271593  |
| H | 8.96480151  | -2.82671671 | 0.06937051  |
| H | -2.20140933 | 3.18155773  | -5.96324169 |
| H | 0.43504749  | 1.80481886  | -4.88265220 |
| H | -5.31133416 | -0.78827620 | 4.12223921  |
| H | -2.06787815 | -2.30364114 | 5.35049592  |
| H | -5.27324033 | 1.83122500  | -2.09257964 |
| H | -9.64373243 | 0.65186951  | 0.75090570  |
| H | 5.16993148  | -4.28129895 | 3.95507491  |
| H | 7.25108301  | -2.99334868 | 0.57218598  |
| H | -3.86558530 | 2.73410584  | -5.53768936 |
| H | 1.80098514  | 0.68896691  | -4.65557480 |
| H | 1.50597103  | -3.20513090 | 3.60576134  |
| H | -0.61359156 | 1.22403636  | -3.20037127 |
| H | -1.07813696 | -1.74739476 | 2.47393913  |
| H | -5.02280479 | 1.75757977  | -3.81374356 |
| H | 7.65174839  | -2.76823811 | -1.15522788 |
| H | 2.90162267  | -4.24630435 | 3.79065971  |
| H | 5.28967055  | -4.36648875 | 2.18511944  |
| H | -2.54278987 | 1.57523564  | -5.27812173 |
| H | -4.07846399 | -2.52478840 | 4.59284250  |
| H | 5.18792195  | -1.88423720 | -3.91791179 |
| H | -9.19367067 | -1.71254037 | 1.00913413  |
| H | -1.41182755 | -3.34859440 | 3.15457205  |
| H | 5.80681208  | -3.27947178 | -2.40165954 |
| H | -5.99636168 | -2.41123317 | 2.80986450  |
| H | -8.90023554 | -1.22007991 | -0.68645278 |
| H | -3.55206765 | -3.99383570 | 3.79578314  |
| H | 0.89657921  | -2.23958076 | -2.25413108 |
| H | 1.77855565  | -1.54441031 | -4.52240051 |
| H | 2.75293944  | -5.26096896 | 1.81121808  |
| H | -0.61503286 | -1.46291781 | -3.02389114 |
| H | 5.10906455  | -4.55313115 | -1.37915813 |
| H | -6.08514206 | -3.71660346 | 4.01785865  |
| H | 3.91357747  | -3.62897081 | -4.06006428 |
| H | -7.58076615 | -3.59156389 | 0.79602026  |

|   |             |             |             |
|---|-------------|-------------|-------------|
| H | -5.51957917 | -4.05549238 | 2.36463451  |
| H | 5.72534609  | -4.95065198 | -3.00618768 |
| H | -5.36351236 | -1.89632089 | -2.13602838 |
| H | 0.33781288  | -2.57918246 | -4.66036951 |
| H | -5.96805503 | -3.16230459 | 0.13902981  |
| H | 1.12434982  | -3.93649431 | -2.69536242 |
| H | 2.60971764  | -5.45706926 | -0.90757581 |
| H | 1.94511120  | -3.25280229 | -4.98210526 |
| H | -7.40761909 | -3.12476076 | -0.93163078 |
| H | -3.35986887 | -5.00148491 | 1.73568298  |
| H | 3.24101971  | -4.85969230 | -3.00562147 |
| H | -4.84035744 | -2.00417335 | -3.79538840 |
| H | -2.25972786 | -2.23253312 | -4.95839017 |
| H | -1.45174548 | -3.48859565 | -2.88344366 |
| H | -3.39124125 | -5.24009207 | -0.97835729 |
| H | -5.44524908 | -4.44808626 | -2.01244766 |
| H | -6.54898238 | -3.75766745 | -3.22888041 |
| H | -3.55155557 | -3.43724437 | -5.14245713 |
| H | -2.82758555 | -4.56306653 | -3.02883781 |
| H | -1.85305820 | -3.93733605 | -5.26187489 |
| H | -5.03043815 | -4.51389273 | -3.73701659 |
| N | 3.18435707  | 2.10989387  | -0.11908843 |
| N | 3.54647599  | 0.06225748  | 2.34605972  |
| N | -3.03658116 | 2.36291079  | -0.20884428 |
| N | 0.05401315  | 1.22915135  | -0.07770066 |
| N | -2.92031138 | 0.29286327  | 2.08125725  |
| N | 2.92031138  | -0.29286327 | -2.08125725 |
| N | -0.05401315 | -1.22915135 | 0.07770066  |
| N | 3.03658116  | -2.36291079 | 0.20884428  |
| N | -3.54647599 | -0.06225748 | -2.34605972 |
| N | -3.18435707 | -2.10989387 | 0.11908843  |
| O | 7.20834533  | 1.58059444  | -0.44005014 |
| O | 7.80384277  | -1.10301233 | 0.08695396  |
| O | -7.80384277 | 1.10301233  | -0.08695396 |
| O | -7.20834533 | -1.58059444 | 0.44005014  |
| K | 0.25097414  | 3.86669554  | -0.30987416 |
| K | 5.17946095  | -0.19124731 | -0.14243241 |
| K | -5.17946095 | 0.19124731  | 0.14243241  |
| K | -0.25097414 | -3.86669554 | 0.30987416  |
| U | 1.63149704  | -0.06570547 | 0.19008348  |
| U | -1.63149704 | 0.06570547  | -0.19008348 |

## Optimal geometries for II with PBE0/ECP60MDF

|   |             |             |             |
|---|-------------|-------------|-------------|
| C | -6.34602089 | -0.44223745 | -4.94511626 |
| C | -4.01688943 | -4.49706475 | -4.26233011 |
| C | -4.20740667 | 0.65373837  | -4.25440797 |
| C | -5.40642155 | -0.15543394 | -3.77936345 |
| C | -0.26415735 | -0.64585298 | -5.32004744 |
| C | -3.16554908 | -4.10945697 | -3.05777016 |
| C | -7.40809587 | -3.05290746 | -2.21550741 |
| C | -6.54836324 | -4.18141265 | -0.15652534 |
| C | -6.12886195 | 0.60659691  | -2.67393740 |
| C | -2.08064589 | -3.11787452 | -3.46103847 |
| C | -0.33902149 | 1.86266745  | -5.27505795 |
| C | -2.55095027 | -5.33896446 | -2.40275500 |
| C | -4.80955575 | 4.61619178  | -3.40967554 |
| C | -6.88758369 | -2.84092133 | -0.79780055 |
| C | 0.05635217  | 0.60317679  | -4.51164436 |
| C | 4.32393598  | -0.09704918 | -5.62962380 |
| C | 3.94480834  | 2.38740672  | -5.70536055 |
| C | 2.88781957  | -5.35227930 | -2.99816098 |
| C | -0.64855202 | 0.55587201  | -3.15525535 |
| C | -7.93159574 | -2.10337402 | 0.03618239  |
| C | -3.91932299 | 4.55624449  | -2.17501554 |
| C | 4.54041462  | 1.23054149  | -4.91042050 |
| C | 2.81075179  | -2.84969816 | -3.00788018 |
| C | -2.56016304 | 3.96183257  | -2.52200218 |
| C | -7.52559825 | 2.89775544  | -0.18139939 |
| C | 1.08762824  | -4.15960547 | -1.73430977 |
| C | 2.53797598  | -4.10830701 | -2.18894556 |
| C | -3.76535673 | 5.94489940  | -1.56259238 |
| C | 6.02675439  | 1.47032052  | -4.66489173 |
| C | 2.27228848  | 5.21483287  | -3.21303111 |
| C | -6.67179712 | 3.02974989  | 1.07525077  |
| C | -3.50162310 | -3.76741847 | 1.58484091  |
| C | 2.18416675  | 3.98729781  | -2.31402070 |
| C | 6.47780052  | -4.49645561 | -1.44340902 |
| C | 7.31770303  | -2.28524084 | -2.24076902 |
| C | -7.31770303 | 2.28524084  | 2.24076902  |
| C | -6.47780052 | 4.49645561  | 1.44340902  |
| C | -1.04606491 | -4.13197746 | 1.31611108  |
| C | 1.04606491  | 4.13197746  | -1.31611108 |
| C | 6.67179712  | -3.02974989 | -1.07525077 |
| C | -2.18416675 | -3.98729781 | 2.31402070  |
| C | 3.50162310  | 3.76741847  | -1.58484091 |

|   |             |             |             |
|---|-------------|-------------|-------------|
| C | -2.27228848 | -5.21483287 | 3.21303111  |
| C | -6.02675439 | -1.47032052 | 4.66489173  |
| C | 3.76535673  | -5.94489940 | 1.56259238  |
| C | 7.52559825  | -2.89775544 | 0.18139939  |
| C | -2.53797598 | 4.10830701  | 2.18894556  |
| C | -1.08762824 | 4.15960547  | 1.73430977  |
| C | -4.54041462 | -1.23054149 | 4.91042050  |
| C | 2.56016304  | -3.96183257 | 2.52200218  |
| C | 3.91932299  | -4.55624449 | 2.17501554  |
| C | 7.93159574  | 2.10337402  | -0.03618239 |
| C | -2.81075179 | 2.84969816  | 3.00788018  |
| C | -2.88781957 | 5.35227930  | 2.99816098  |
| C | -3.94480834 | -2.38740672 | 5.70536055  |
| C | 0.64855202  | -0.55587201 | 3.15525535  |
| C | -4.32393598 | 0.09704918  | 5.62962380  |
| C | 6.88758369  | 2.84092133  | 0.79780055  |
| C | 4.80955575  | -4.61619178 | 3.40967554  |
| C | -0.05635217 | -0.60317679 | 4.51164436  |
| C | 2.55095027  | 5.33896446  | 2.40275500  |
| C | 6.54836324  | 4.18141265  | 0.15652534  |
| C | 7.40809587  | 3.05290746  | 2.21550741  |
| C | 0.33902149  | -1.86266745 | 5.27505795  |
| C | 6.12886195  | -0.60659691 | 2.67393740  |
| C | 2.08064589  | 3.11787452  | 3.46103847  |
| C | 3.16554908  | 4.10945697  | 3.05777016  |
| C | 0.26415735  | 0.64585298  | 5.32004744  |
| C | 5.40642155  | 0.15543394  | 3.77936345  |
| C | 4.20740667  | -0.65373837 | 4.25440797  |
| C | 4.01688943  | 4.49706475  | 4.26233011  |
| C | 6.34602089  | 0.44223745  | 4.94511626  |
| H | -5.81616423 | -1.00797528 | -5.72574139 |
| H | -6.72486365 | 0.49243073  | -5.38512460 |
| H | -7.20355834 | -1.04416656 | -4.61190490 |
| H | -3.40431831 | -4.97366376 | -5.04314594 |
| H | -4.49779234 | -3.60264440 | -4.68445031 |
| H | -4.80276738 | -5.20549825 | -3.95895190 |
| H | -3.60476562 | 0.06502118  | -4.96111346 |
| H | -4.52488238 | 1.58052847  | -4.75465478 |
| H | -6.65039407 | -3.54192570 | -2.84346802 |
| H | 0.28712711  | -0.62399253 | -6.27162688 |
| H | -1.33952728 | -0.71392996 | -5.53964144 |
| H | -5.74432699 | -4.67273397 | -0.72122318 |
| H | 0.16711422  | 1.88692942  | -6.25196572 |
| H | -6.50354246 | 1.56834060  | -3.05275763 |



|   |             |             |             |
|---|-------------|-------------|-------------|
| H | -8.30385934 | -3.69115286 | -2.19380624 |
| H | -1.39325354 | -3.57668858 | -4.18713655 |
| H | -1.42630349 | 1.88931289  | -5.44655504 |
| H | -7.43099168 | -4.83889989 | -0.14000679 |
| H | -2.52623671 | -2.23216037 | -3.93728655 |
| H | -1.89154642 | -5.87351752 | -3.10303564 |
| H | -3.58649140 | 0.92910340  | -3.39228030 |
| H | -6.98069687 | 0.03074998  | -2.28656991 |
| H | 0.03729586  | -1.54430668 | -4.76378020 |
| H | -3.34293856 | -6.02806368 | -2.07285892 |
| H | -4.94521574 | 3.60936644  | -3.82930846 |
| H | -4.36779251 | 5.26227660  | -4.18305543 |
| H | -7.67614225 | -2.09725025 | -2.68548448 |
| H | 4.81452096  | -0.09648817 | -6.61508852 |
| H | -6.20597519 | -4.03688010 | 0.87781695  |
| H | -5.79972259 | 5.01603849  | -3.14466946 |
| H | 3.24918362  | -0.28171698 | -5.76310617 |
| H | 2.25015038  | -5.42803135 | -3.89170493 |
| H | -0.04394208 | 2.75641683  | -4.70813356 |
| H | -5.44394434 | 0.83634030  | -1.84406076 |
| H | 4.42847541  | 2.46417438  | -6.69051411 |
| H | -1.49844573 | -2.79163155 | -2.58652173 |
| H | 2.86656851  | 2.23914220  | -5.86064105 |
| H | -1.73121732 | 0.46181559  | -3.30680024 |
| H | -1.95985907 | -5.04141984 | -1.52539349 |
| H | 2.21322751  | -2.85529390 | -3.93136524 |
| H | -8.87877714 | -2.66176964 | 0.06749041  |
| H | 4.74151903  | -0.92305338 | -5.03352729 |
| H | 0.41604105  | -4.23897698 | -2.60063290 |
| H | 3.93857227  | -5.32456264 | -3.32305920 |
| H | -2.67740298 | 2.96463711  | -2.96745673 |
| H | 2.74146736  | -6.25486651 | -2.38666423 |
| H | -7.02549660 | 3.39077995  | -1.02604736 |
| H | -2.02258612 | 4.59902947  | -3.24012458 |
| H | -7.66710057 | 1.83691307  | -0.43856615 |
| H | 4.08564468  | 3.33817406  | -5.17168390 |
| H | -0.28032779 | -0.31591013 | -2.58535413 |
| H | -8.51697262 | 3.35244040  | -0.03267670 |
| H | 3.87310117  | -2.79278721 | -3.29121925 |
| H | -8.13358375 | -1.10713017 | -0.38701914 |
| H | 6.57649187  | 1.55818239  | -5.61364111 |
| H | -0.44320189 | 1.47980937  | -2.58608339 |
| H | -7.58752543 | -1.98538369 | 1.07703072  |
| H | -3.28440111 | 6.63219688  | -2.27534972 |

|   |             |             |             |
|---|-------------|-------------|-------------|
| H | 1.33728954  | 5.33449075  | -3.78014873 |
| H | -4.75285636 | 6.35441745  | -1.30078018 |
| H | 2.54221339  | -1.93870380 | -2.45359279 |
| H | 0.92743187  | -5.04172222 | -1.09608004 |
| H | 3.09866912  | 5.11200599  | -3.93226264 |
| H | -3.75302142 | -4.64646419 | 0.97614270  |
| H | 0.80954571  | -3.25419734 | -1.17187473 |
| H | -1.93655856 | 3.86282387  | -1.62144610 |
| H | 5.85812396  | -4.59403640 | -2.34523433 |
| H | 6.66003435  | -2.30734218 | -3.12341866 |
| H | 6.46702214  | 0.63066160  | -4.10264244 |
| H | -3.43083824 | -2.91480141 | 0.89450056  |
| H | 6.17658151  | 2.39862897  | -4.09188483 |
| H | -3.16094556 | 5.89620716  | -0.64678265 |
| H | -1.23157151 | -4.97681825 | 0.63603570  |
| H | 0.10439255  | 4.32411303  | -1.84663923 |
| H | -7.52127255 | 1.23475640  | 1.97460149  |
| H | 2.43873441  | 6.12500541  | -2.61747011 |
| H | 7.45246448  | -4.96976383 | -1.63394920 |
| H | -5.98052653 | 5.04324505  | 0.63006698  |
| H | 8.28012680  | -2.74138810 | -2.51569289 |
| H | -4.31900531 | -3.59337000 | 2.30127044  |
| H | -0.92156274 | -3.21819250 | 0.71445520  |
| H | -8.28012680 | 2.74138810  | 2.51569289  |
| H | -7.45246448 | 4.96976383  | 1.63394920  |
| H | 5.98052653  | -5.04324505 | -0.63006698 |
| H | 7.52127255  | -1.23475640 | -1.97460149 |
| H | -2.43873441 | -6.12500541 | 2.61747011  |
| H | 4.31900531  | 3.59337000  | -2.30127044 |
| H | 3.16094556  | -5.89620716 | 0.64678265  |
| H | 0.92156274  | 3.21819250  | -0.71445520 |
| H | -6.17658151 | -2.39862897 | 4.09188483  |
| H | 1.23157151  | 4.97681825  | -0.63603570 |
| H | -6.46702214 | -0.63066160 | 4.10264244  |
| H | -6.66003435 | 2.30734218  | 3.12341866  |
| H | -0.10439255 | -4.32411303 | 1.84663923  |
| H | -5.85812396 | 4.59403640  | 2.34523433  |
| H | 3.43083824  | 2.91480141  | -0.89450056 |
| H | -3.09866912 | -5.11200599 | 3.93226264  |
| H | 3.75302142  | 4.64646419  | -0.97614270 |
| H | 4.75285636  | -6.35441745 | 1.30078018  |
| H | 1.93655856  | -3.86282387 | 1.62144610  |
| H | -0.80954571 | 3.25419734  | 1.17187473  |
| H | 3.28440111  | -6.63219688 | 2.27534972  |

|   |             |             |             |
|---|-------------|-------------|-------------|
| H | -6.57649187 | -1.55818239 | 5.61364111  |
| H | -1.33728954 | -5.33449075 | 3.78014873  |
| H | -0.92743187 | 5.04172222  | 1.09608004  |
| H | 8.51697262  | -3.35244040 | 0.03267670  |
| H | 7.58752543  | 1.98538369  | -1.07703072 |
| H | 8.13358375  | 1.10713017  | 0.38701914  |
| H | 7.66710057  | -1.83691307 | 0.43856615  |
| H | -2.54221339 | 1.93870380  | 2.45359279  |
| H | -4.08564468 | -3.33817406 | 5.17168390  |
| H | 7.02549660  | -3.39077995 | 1.02604736  |
| H | -3.87310117 | 2.79278721  | 3.29121925  |
| H | -2.74146736 | 6.25486651  | 2.38666423  |
| H | 0.44320189  | -1.47980937 | 2.58608339  |
| H | 8.87877714  | 2.66176964  | -0.06749041 |
| H | 2.02258612  | -4.59902947 | 3.24012458  |
| H | -3.93857227 | 5.32456264  | 3.32305920  |
| H | 0.28032779  | 0.31591013  | 2.58535413  |
| H | -4.74151903 | 0.92305338  | 5.03352729  |
| H | 2.67740298  | -2.96463711 | 2.96745673  |
| H | -0.41604105 | 4.23897698  | 2.60063290  |
| H | -4.42847541 | -2.46417438 | 6.69051411  |
| H | 1.95985907  | 5.04141984  | 1.52539349  |
| H | -2.86656851 | -2.23914220 | 5.86064105  |
| H | -2.21322751 | 2.85529390  | 3.93136524  |
| H | 5.79972259  | -5.01603849 | 3.14466946  |
| H | 1.73121732  | -0.46181559 | 3.30680024  |
| H | -2.25015038 | 5.42803135  | 3.89170493  |
| H | -4.81452096 | 0.09648817  | 6.61508852  |
| H | -3.24918362 | 0.28171698  | 5.76310617  |
| H | 6.20597519  | 4.03688010  | -0.87781695 |
| H | 1.49844573  | 2.79163155  | 2.58652173  |
| H | 5.44394434  | -0.83634030 | 1.84406076  |
| H | 7.67614225  | 2.09725025  | 2.68548448  |
| H | 0.04394208  | -2.75641683 | 4.70813356  |
| H | 4.36779251  | -5.26227660 | 4.18305543  |
| H | 4.94521574  | -3.60936644 | 3.82930846  |
| H | 3.34293856  | 6.02806368  | 2.07285892  |
| H | 6.98069687  | -0.03074998 | 2.28656991  |
| H | 8.30385934  | 3.69115286  | 2.19380624  |
| H | 7.43099168  | 4.83889989  | 0.14000679  |
| H | -0.03729586 | 1.54430668  | 4.76378020  |
| H | 1.89154642  | 5.87351752  | 3.10303564  |
| H | 6.50354246  | -1.56834060 | 3.05275763  |
| H | 3.58649140  | -0.92910340 | 3.39228030  |

|    |             |             |             |
|----|-------------|-------------|-------------|
| H  | 1.42630349  | -1.88931289 | 5.44655504  |
| H  | 2.52623671  | 2.23216037  | 3.93728655  |
| H  | -0.16711422 | -1.88692942 | 6.25196572  |
| H  | 5.74432699  | 4.67273397  | 0.72122318  |
| H  | 1.39325354  | 3.57668858  | 4.18713655  |
| H  | 6.65039407  | 3.54192570  | 2.84346802  |
| H  | -0.28712711 | 0.62399253  | 6.27162688  |
| H  | 1.33952728  | 0.71392996  | 5.53964144  |
| H  | 4.52488238  | -1.58052847 | 4.75465478  |
| H  | 4.80276738  | 5.20549825  | 3.95895190  |
| H  | 3.60476562  | -0.06502118 | 4.96111346  |
| H  | 4.49779234  | 3.60264440  | 4.68445031  |
| H  | 7.20355834  | 1.04416656  | 4.61190490  |
| H  | 3.40431831  | 4.97366376  | 5.04314594  |
| H  | 6.72486365  | -0.49243073 | 5.38512460  |
| H  | 5.81616423  | 1.00797528  | 5.72574139  |
| N  | -0.04891013 | -1.18382159 | -0.35905239 |
| N  | 0.04891013  | 1.18382159  | 0.35905239  |
| O  | -4.94460430 | -1.42874902 | -3.33090378 |
| O  | -4.03342029 | -3.54027239 | -2.07237041 |
| O  | -5.72109897 | -2.00474442 | -0.78070901 |
| O  | 1.47348596  | 0.58616029  | -4.33856527 |
| O  | -3.31469961 | -1.04744851 | -1.17081158 |
| O  | -4.60380568 | 3.70326751  | -1.25323020 |
| O  | 1.88026038  | 2.89148601  | -3.18599381 |
| O  | 3.94773314  | 1.14491661  | -3.61009163 |
| O  | -3.09459828 | 1.69994214  | -0.13029029 |
| O  | 3.36923753  | -4.16435529 | -1.02243642 |
| O  | -5.41653116 | 2.37587774  | 0.84549611  |
| O  | 2.28884649  | 0.62024265  | -1.71987411 |
| O  | 5.41653116  | -2.37587774 | -0.84549611 |
| O  | -2.28884649 | -0.62024265 | 1.71987411  |
| O  | -3.36923753 | 4.16435529  | 1.02243642  |
| O  | 3.09459828  | -1.69994214 | 0.13029029  |
| O  | -3.94773314 | -1.14491661 | 3.61009163  |
| O  | -1.88026038 | -2.89148601 | 3.18599381  |
| O  | 4.60380568  | -3.70326751 | 1.25323020  |
| O  | 3.31469961  | 1.04744851  | 1.17081158  |
| O  | 5.72109897  | 2.00474442  | 0.78070901  |
| O  | -1.47348596 | -0.58616029 | 4.33856527  |
| O  | 4.03342029  | 3.54027239  | 2.07237041  |
| O  | 4.94460430  | 1.42874902  | 3.33090378  |
| Si | -4.43814244 | -1.96484212 | -1.85517533 |
| Si | 2.35091452  | 1.32097447  | -3.15987434 |

|    |             |             |             |
|----|-------------|-------------|-------------|
| Si | -4.03874780 | 2.97851600  | 0.11282556  |
| Si | 4.03874780  | -2.97851600 | -0.11282556 |
| Si | -2.35091452 | -1.32097447 | 3.15987434  |
| Si | 4.43814244  | 1.96484212  | 1.85517533  |
| K  | -5.01430502 | -0.27293858 | 1.21062445  |
| K  | 5.01430502  | 0.27293858  | -1.21062445 |
| U  | -1.60694058 | 0.07417576  | -0.23643750 |
| U  | 1.60694058  | -0.07417576 | 0.23643750  |

### Optimal geometries for III with PBE0/ECP60MDF

|   |             |             |             |
|---|-------------|-------------|-------------|
| C | 2.27907454  | -3.49367048 | -5.63079101 |
| C | 6.66233183  | -0.99589291 | -2.68494810 |
| C | 2.00323688  | -3.55813168 | -4.13064479 |
| C | -1.01614276 | -5.11930486 | -4.85217064 |
| C | 3.13989192  | -2.90872198 | -3.35500493 |
| C | 7.68935972  | 2.65785069  | -2.69958609 |
| C | -0.94777529 | -3.59576329 | -4.92806894 |
| C | 6.99071187  | -0.30484360 | -1.36456613 |
| C | 7.03676797  | -1.30914358 | -0.22010131 |
| C | 1.54038386  | 0.54637111  | -4.68377514 |
| C | -2.33268355 | -2.96438333 | -4.95327506 |
| C | 6.20971092  | 2.53618384  | -2.34595416 |
| C | 0.30529350  | -0.34673984 | -4.72408713 |
| C | 0.42518888  | -4.85507071 | -1.47553816 |
| C | 3.51295370  | 0.59044508  | -2.40153323 |
| C | 2.77210716  | 1.80995563  | -2.97946408 |
| C | 5.61245819  | 3.89717573  | -1.99709088 |
| C | 3.49931183  | -3.32020312 | 0.15568745  |
| C | -0.11718580 | -3.46981295 | -1.80665208 |
| C | 0.73804311  | 2.71898806  | -3.89505268 |
| C | 7.61591966  | 2.25002097  | 0.93549219  |
| C | -2.71430380 | 2.57753497  | -5.73699164 |
| C | 2.74585019  | -5.26840635 | 1.53706313  |
| C | 3.51301493  | -3.94959550 | 1.54120197  |
| C | 6.17833288  | 1.75676700  | 0.79263134  |
| C | -1.60737425 | -3.38459635 | -1.49441291 |
| C | -3.40894423 | -0.07902012 | -3.48267899 |
| C | -2.89927776 | 3.54943051  | -4.57407090 |
| C | 5.36535189  | -1.44952995 | 3.14077224  |
| C | -0.10617565 | 3.19124174  | -2.71963404 |
| C | 5.19045339  | 2.76159678  | 1.37162598  |
| C | 4.14303368  | -4.41192550 | 4.78142126  |
| C | -4.14303368 | 4.41192550  | -4.78142126 |

|   |             |             |             |
|---|-------------|-------------|-------------|
| C | 3.93331358  | -1.12729607 | 2.71879896  |
| C | -3.93331358 | 1.12729607  | -2.71879896 |
| C | -5.19045339 | -2.76159678 | -1.37162598 |
| C | -5.36535189 | 1.44952995  | -3.14077224 |
| C | 2.89927776  | -3.54943051 | 4.57407090  |
| C | 0.10617565  | -3.19124174 | 2.71963404  |
| C | 3.40894423  | 0.07902012  | 3.48267899  |
| C | -6.17833288 | -1.75676700 | -0.79263134 |
| C | -7.61591966 | -2.25002097 | -0.93549219 |
| C | 1.60737425  | 3.38459635  | 1.49441291  |
| C | -3.51301493 | 3.94959550  | -1.54120197 |
| C | 2.71430380  | -2.57753497 | 5.73699164  |
| C | -2.74585019 | 5.26840635  | -1.53706313 |
| C | -0.73804311 | -2.71898806 | 3.89505268  |
| C | -5.61245819 | -3.89717573 | 1.99709088  |
| C | -3.49931183 | 3.32020312  | -0.15568745 |
| C | 0.11718580  | 3.46981295  | 1.80665208  |
| C | -2.77210716 | -1.80995563 | 2.97946408  |
| C | -0.42518888 | 4.85507071  | 1.47553816  |
| C | -3.51295370 | -0.59044508 | 2.40153323  |
| C | -6.20971092 | -2.53618384 | 2.34595416  |
| C | 2.33268355  | 2.96438333  | 4.95327506  |
| C | -0.30529350 | 0.34673984  | 4.72408713  |
| C | -7.03676797 | 1.30914358  | 0.22010131  |
| C | -1.54038386 | -0.54637111 | 4.68377514  |
| C | -7.68935972 | -2.65785069 | 2.69958609  |
| C | -6.99071187 | 0.30484360  | 1.36456613  |
| C | 0.94777529  | 3.59576329  | 4.92806894  |
| C | 1.01614276  | 5.11930486  | 4.85217064  |
| C | -3.13989192 | 2.90872198  | 3.35500493  |
| C | -2.00323688 | 3.55813168  | 4.13064479  |
| C | -6.66233183 | 0.99589291  | 2.68494810  |
| C | -2.27907454 | 3.49367048  | 5.63079101  |
| H | 3.27309788  | -3.91170060 | -5.86721735 |
| H | 1.54094998  | -4.05673635 | -6.22080104 |
| H | 7.39857021  | -1.78340968 | -2.92289129 |
| H | 2.27489380  | -2.45464113 | -6.00096817 |
| H | 6.64693600  | -0.29393407 | -3.53452159 |
| H | 4.08670927  | -3.46401034 | -3.46772807 |
| H | -0.01898869 | -5.58683305 | -4.87223986 |
| H | 5.67462805  | -1.48361287 | -2.64245072 |
| H | -1.59162053 | -5.53628720 | -5.69667606 |
| H | 1.96121815  | -4.62605559 | -3.84586482 |
| H | 8.10817113  | 1.70790490  | -3.06384196 |

|   |             |             |             |
|---|-------------|-------------|-------------|
| H | -0.46709944 | -3.33900302 | -5.89059243 |
| H | 7.84720001  | 3.41030250  | -3.49213017 |
| H | 7.68328212  | -2.17029987 | -0.46388744 |
| H | 3.32076911  | -1.88553980 | -3.71332238 |
| H | 7.99677635  | 0.14420276  | -1.45694989 |
| H | 0.37386034  | -0.97215672 | -5.63566589 |
| H | 1.68310553  | 1.09477076  | -5.63617036 |
| H | 2.41773300  | -0.09822312 | -4.54528739 |
| H | -1.51645379 | -5.45589454 | -3.92933175 |
| H | -2.93376977 | -3.36123416 | -5.78998805 |
| H | 8.29473273  | 2.97116968  | -1.83427367 |
| H | 5.69058073  | 2.16929066  | -3.25287671 |
| H | 2.92385939  | -2.84218269 | -2.27984839 |
| H | 4.23251069  | 0.22631871  | -3.15848062 |
| H | 6.03595816  | -1.71374501 | 0.00123207  |
| H | -0.00928252 | -5.62746968 | -2.12913741 |
| H | 1.51768646  | -4.91058897 | -1.58256365 |
| H | 3.39834047  | 2.34517767  | -3.72173761 |
| H | 3.81505877  | -4.02961149 | -0.62609487 |
| H | -2.27212077 | -1.87471611 | -5.07348186 |
| H | 7.41873303  | -0.86587560 | 0.71146181  |
| H | -0.58244170 | 0.29691231  | -4.89120339 |
| H | 2.73515248  | -0.21446490 | -2.38299466 |
| H | 8.34533038  | 1.52845992  | 0.53577696  |
| H | 5.67850057  | 4.59936128  | -2.84637686 |
| H | 3.18439304  | -5.98953143 | 0.82561243  |
| H | -2.89988404 | -3.16079742 | -4.03028337 |
| H | -2.56554663 | 3.11527130  | -6.68908793 |
| H | 0.05359310  | 2.50498100  | -4.72640414 |
| H | -1.85139632 | 1.90891138  | -5.59393963 |
| H | 0.18509682  | -5.13604128 | -0.43591409 |
| H | 4.19331699  | -2.46433118 | 0.08845332  |
| H | 1.44943730  | 3.49624954  | -4.23938698 |
| H | 2.47561838  | -2.98631828 | -0.09629709 |
| H | 4.56216124  | -4.15534567 | 1.82084688  |
| H | 7.76980630  | 3.20048664  | 0.39951960  |
| H | 6.14872853  | 4.36371600  | -1.15465883 |
| H | -3.60150453 | 1.93737148  | -5.86756327 |
| H | -2.18255608 | -4.16373258 | -2.01745045 |
| H | 0.39772490  | -2.73831755 | -1.14869244 |
| H | 4.55134323  | 3.82452334  | -1.70986490 |
| H | 2.60137515  | 2.53192226  | -2.16388313 |
| H | -3.37052503 | 0.11405167  | -4.56434634 |
| H | 6.08135326  | 0.83178577  | 1.38977217  |

|   |             |             |             |
|---|-------------|-------------|-------------|
| H | 1.70038423  | -5.11351231 | 1.23044693  |
| H | 2.73216750  | -5.74929099 | 2.52728300  |
| H | 5.78798851  | -2.30221310 | 2.58868034  |
| H | 7.87499917  | 2.43067009  | 1.99300632  |
| H | -2.38938829 | -0.38787928 | -3.19431163 |
| H | -2.02481916 | -2.41719320 | -1.81938405 |
| H | 4.26512478  | -5.17238102 | 3.99640820  |
| H | -4.05994247 | -0.95592671 | -3.33662951 |
| H | -2.02760229 | 4.23229076  | -4.57209938 |
| H | -1.79547102 | -3.53317613 | -0.41162183 |
| H | 6.03187699  | -0.58690396 | 2.97406483  |
| H | -4.09583672 | 4.94286170  | -5.74798487 |
| H | 3.96505616  | -0.84733566 | 1.64646762  |
| H | 5.13066989  | 3.68915660  | 0.78244385  |
| H | -0.46108157 | 4.21551758  | -2.93830518 |
| H | 5.06248374  | -3.80660707 | 4.79330835  |
| H | 0.56219484  | 3.32889574  | -1.83863177 |
| H | -5.46493294 | -3.04628183 | -2.40271720 |
| H | 5.41675701  | -1.68969026 | 4.21416721  |
| H | 4.17601165  | 2.34332854  | 1.44114067  |
| H | -5.06248374 | 3.80660707  | -4.79330835 |
| H | -5.41675701 | 1.68969026  | -4.21416721 |
| H | 4.09583672  | -4.94286170 | 5.74798487  |
| H | 5.46493294  | 3.04628183  | 2.40271720  |
| H | -4.17601165 | -2.34332854 | -1.44114067 |
| H | -5.13066989 | -3.68915660 | -0.78244385 |
| H | 0.46108157  | -4.21551758 | 2.93830518  |
| H | -0.56219484 | -3.32889574 | 1.83863177  |
| H | -6.03187699 | 0.58690396  | -2.97406483 |
| H | -4.26512478 | 5.17238102  | -3.99640820 |
| H | 2.02760229  | -4.23229076 | 4.57209938  |
| H | -3.96505616 | 0.84733566  | -1.64646762 |
| H | -7.87499917 | -2.43067009 | -1.99300632 |
| H | 4.05994247  | 0.95592671  | 3.33662951  |
| H | 1.79547102  | 3.53317613  | 0.41162183  |
| H | -5.78798851 | 2.30221310  | -2.58868034 |
| H | -2.73216750 | 5.74929099  | -2.52728300 |
| H | 2.38938829  | 0.38787928  | 3.19431163  |
| H | 2.02481916  | 2.41719320  | 1.81938405  |
| H | -6.08135326 | -0.83178577 | -1.38977217 |
| H | -7.76980630 | -3.20048664 | -0.39951960 |
| H | -1.70038423 | 5.11351231  | -1.23044693 |
| H | 3.37052503  | -0.11405167 | 4.56434634  |
| H | -6.14872853 | -4.36371600 | 1.15465883  |



|   |             |             |             |
|---|-------------|-------------|-------------|
| H | 3.60150453  | -1.93737148 | 5.86756327  |
| H | -4.55134323 | -3.82452334 | 1.70986490  |
| H | -4.56216124 | 4.15534567  | -1.82084688 |
| H | 2.18255608  | 4.16373258  | 2.01745045  |
| H | -2.60137515 | -2.53192226 | 2.16388313  |
| H | 2.56554663  | -3.11527130 | 6.68908793  |
| H | -0.39772490 | 2.73831755  | 1.14869244  |
| H | 1.85139632  | -1.90891138 | 5.59393963  |
| H | -8.34533038 | -1.52845992 | -0.53577696 |
| H | -1.44943730 | -3.49624954 | 4.23938698  |
| H | -2.47561838 | 2.98631828  | 0.09629709  |
| H | -0.18509682 | 5.13604128  | 0.43591409  |
| H | -5.67850057 | -4.59936128 | 2.84637686  |
| H | -4.19331699 | 2.46433118  | -0.08845332 |
| H | -0.05359310 | -2.50498100 | 4.72640414  |
| H | -3.18439304 | 5.98953143  | -0.82561243 |
| H | 2.89988404  | 3.16079742  | 4.03028337  |
| H | -7.41873303 | 0.86587560  | -0.71146181 |
| H | 0.58244170  | -0.29691231 | 4.89120339  |
| H | -2.73515248 | 0.21446490  | 2.38299466  |
| H | 2.27212077  | 1.87471611  | 5.07348186  |
| H | -3.81505877 | 4.02961149  | 0.62609487  |
| H | -8.29473273 | -2.97116968 | 1.83427367  |
| H | -3.39834047 | -2.34517767 | 3.72173761  |
| H | 0.00928252  | 5.62746968  | 2.12913741  |
| H | -1.51768646 | 4.91058897  | 1.58256365  |
| H | -6.03595816 | 1.71374501  | -0.00123207 |
| H | -5.69058073 | -2.16929066 | 3.25287671  |
| H | 2.93376977  | 3.36123416  | 5.78998805  |
| H | 1.51645379  | 5.45589454  | 3.92933175  |
| H | -4.23251069 | -0.22631871 | 3.15848062  |
| H | -2.92385939 | 2.84218269  | 2.27984839  |
| H | -7.84720001 | -3.41030250 | 3.49213017  |
| H | -7.99677635 | -0.14420276 | 1.45694989  |
| H | -1.68310553 | -1.09477076 | 5.63617036  |
| H | -2.41773300 | 0.09822312  | 4.54528739  |
| H | -0.37386034 | 0.97215672  | 5.63566589  |
| H | -7.68328212 | 2.17029987  | 0.46388744  |
| H | -8.10817113 | -1.70790490 | 3.06384196  |
| H | -3.32076911 | 1.88553980  | 3.71332238  |
| H | 1.59162053  | 5.53628720  | 5.69667606  |
| H | 0.46709944  | 3.33900302  | 5.89059243  |
| H | -5.67462805 | 1.48361287  | 2.64245072  |
| H | 0.01898869  | 5.58683305  | 4.87223986  |

|    |             |             |             |
|----|-------------|-------------|-------------|
| H  | -1.96121815 | 4.62605559  | 3.84586482  |
| H  | -6.64693600 | 0.29393407  | 3.53452159  |
| H  | -4.08670927 | 3.46401034  | 3.46772807  |
| H  | -7.39857021 | 1.78340968  | 2.92289129  |
| H  | -2.27489380 | 2.45464113  | 6.00096817  |
| H  | -1.54094998 | 4.05673635  | 6.22080104  |
| H  | -3.27309788 | 3.91170060  | 5.86721735  |
| Li | 2.97222100  | -0.67557154 | -0.47574241 |
| Li | 2.70585748  | 1.58302384  | -0.00243449 |
| Li | -2.70585748 | -1.58302384 | 0.00243449  |
| Li | -2.97222100 | 0.67557154  | 0.47574241  |
| N  | 0.16771362  | -1.11965378 | -3.49615344 |
| N  | 1.46426257  | 1.48513462  | -3.55369256 |
| N  | 4.09934281  | 0.78437751  | -1.08661021 |
| N  | -1.17293760 | 2.24733059  | -2.42648891 |
| N  | 1.31763925  | 0.26117949  | -0.04339479 |
| N  | 1.17293760  | -2.24733059 | 2.42648891  |
| N  | -1.31763925 | -0.26117949 | 0.04339479  |
| N  | -4.09934281 | -0.78437751 | 1.08661021  |
| N  | -1.46426257 | -1.48513462 | 3.55369256  |
| N  | -0.16771362 | 1.11965378  | 3.49615344  |
| Si | 0.26735642  | -2.85105170 | -3.60760626 |
| Si | 5.78614438  | 1.18070716  | -1.01256670 |
| Si | 2.80230005  | -2.69179721 | 2.83290091  |
| Si | -2.80230005 | 2.69179721  | -2.83290091 |
| Si | -5.78614438 | -1.18070716 | 1.01256670  |
| Si | -0.26735642 | 2.85105170  | 3.60760626  |
| U  | -0.14801286 | 0.31085015  | -1.65522429 |
| U  | 0.14801286  | -0.31085015 | 1.65522429  |
